# Supplementary material
Source: PubMed Central journal article supplement (PMC8586964)
Supplement: bloodBLD2020009686-suppl1.pdf [file bloodBLD2020009686-suppl1.pdf]

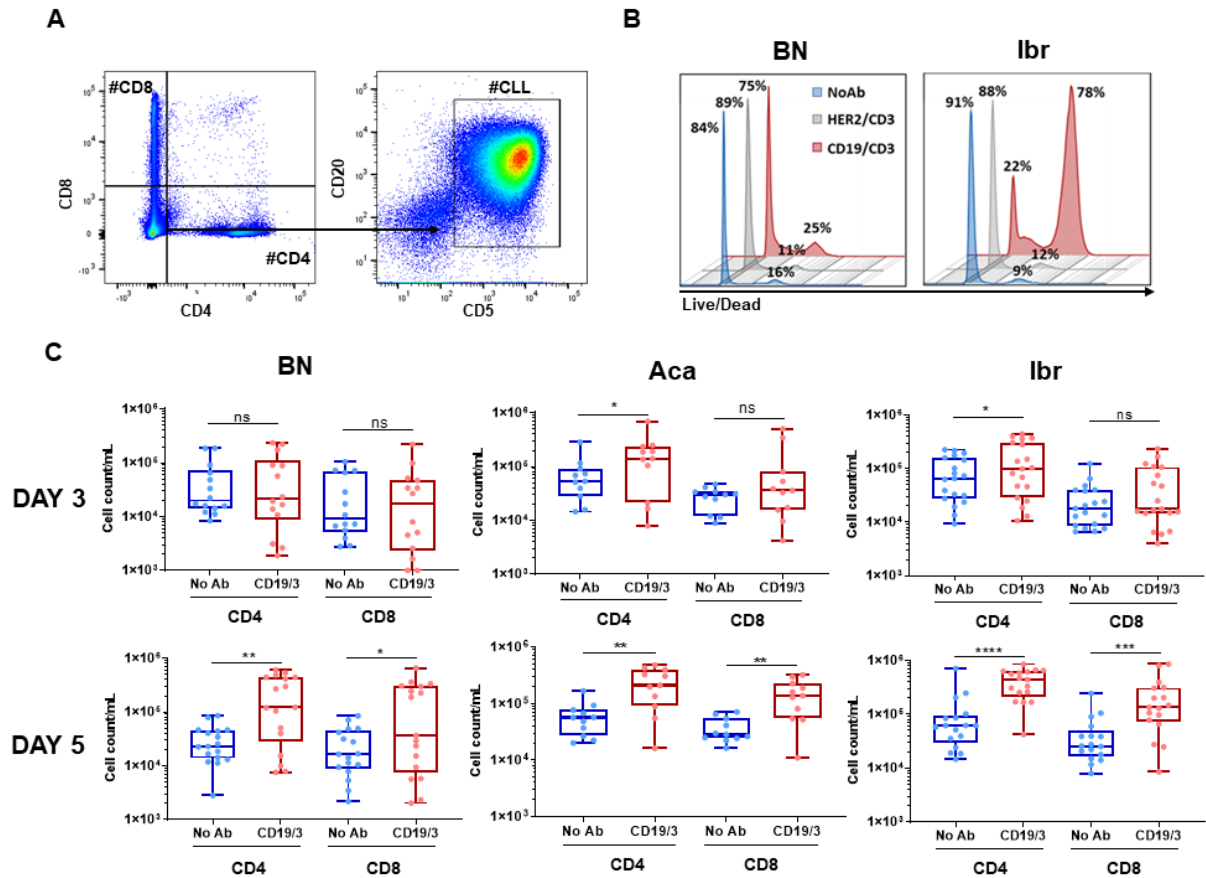

**Supplemental Figure S1. CD19/CD3 bsAb promotes rapid expansion of autologous T cells in BTKi-treated patient samples.** PBMCs from BTKi-naïve (BN) and BTKi-treated (BTKi) patients were cultured with either CD19/CD3 bsAb, or medium only. (A) Representative gating strategy shown for a BTKi-naïve patient sample. (B) Percent dead CLL cells (LIVE/DEAD positive) after 3 days in culture with either CD19/CD3 bsAb, HER2/CD3 bsAb, or medium only (No Ab) shown for a BTKi-naïve (BN) and an ibrutinib-treated (lbr) patient sample. CD4+ and CD8+ T cell counts were quantified after 3 and 5 days by flow cytometry. (C) T cell counts/mL for BTKi-naïve (BN, n = 17), acalabrutinib-treated (n = 11), and ibrutinib-treated (n = 19) samples after culture with CD19/CD3 bsAb (CD19/CD3, red circles) or medium only (NoAb, blue circles). Each symbol represents one patient sample. Wilcoxon matched-pair signed-rank test for comparison of different treatments applied to individual patient samples and Mann-Whitney test for comparison of different patient groups. \*,  $P < .05$ ; \*\*,  $P < .001$ ; \*\*\*,  $P < .001$ ; \*\*\*\*,  $P < .0001$ .

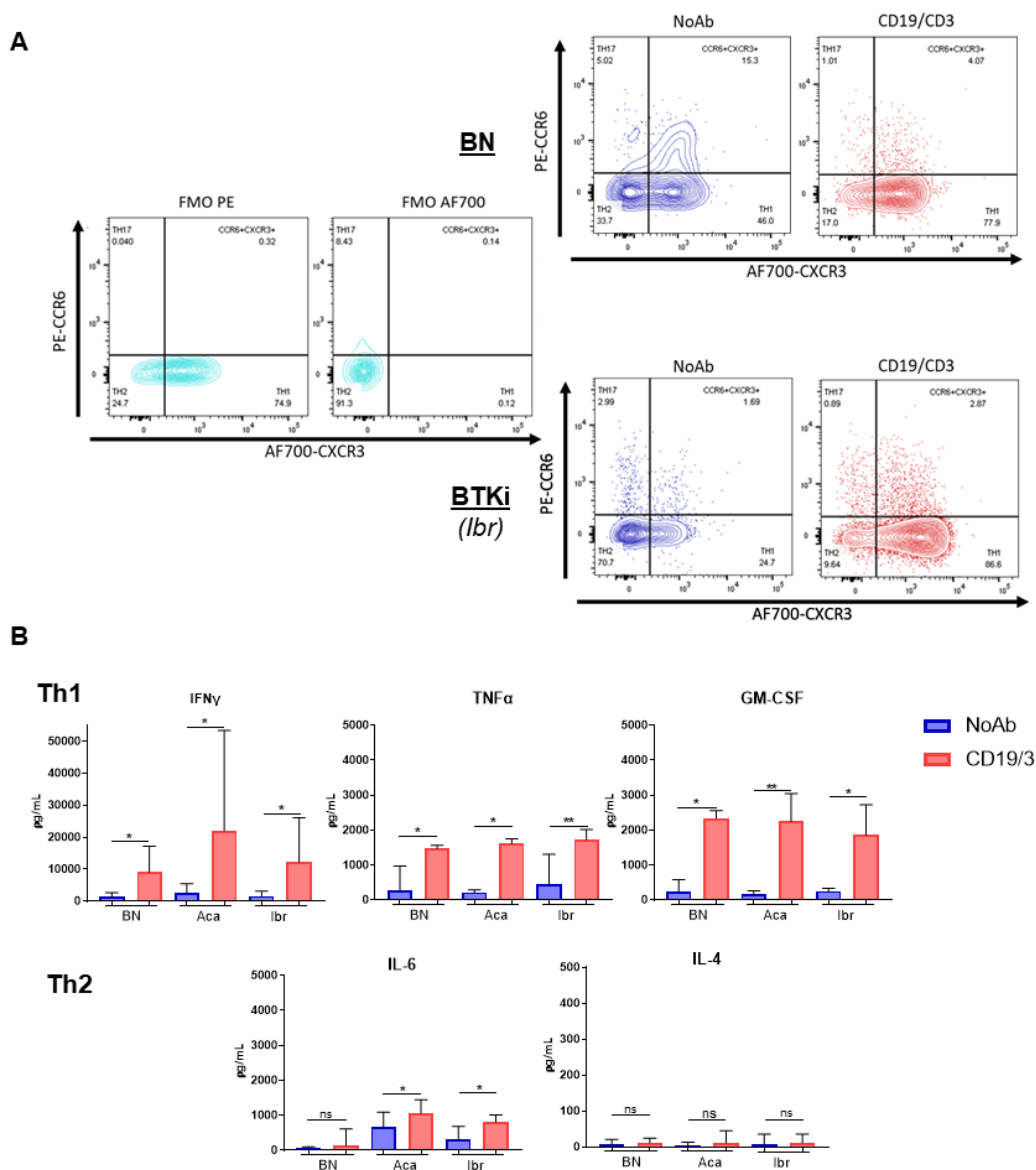

**Supplemental Figure S2. Strategy to identify Th1 or Th2 polarization of CD4 T cells.** PBMCs from BTKi-naïve (BN, n = 14) and BTKi-treated (BTKi, n = 30) patients were cultured with either CD19/CD3 bsAb, or medium only. (A) Gating on CD4+ T cells, flow cytometry was performed to analyze T cell polarization into Th1, Th2, Th17 T helper subsets based on CCR6 and CXCR3 expression. Representative contour plot layout of a BTKi-naïve (BN) and an ibrutinib-treated (BTKi, lbr) patient after 3 days of culture with CD19/CD3 bsAb (CD19/3, red) or medium only (No Ab, blue) are shown. Fluorescence minus one (FMO) controls were used to set the gates. (B) Th1 (IFN $\gamma$ , TNF $\alpha$ , GM-CSF) and Th2 (IL-6, IL-4) cytokine levels were measured by Luminex cytokine assay in cell supernatants harvested after 5 days of exposure to CD19/CD3 bsAb (CD19/CD3, red bars) or medium only (NoAb, blue bars) for BTKi-naïve (BN, n = 7), acalabrutinib-treated (Aca, n = 8), and ibrutinib-treated (lbr, n = 8) patients. Asterisks indicate statistical significance using Wilcoxon's signed rank test. \*,  $P < .05$ ; \*\*,  $P < .01$ .

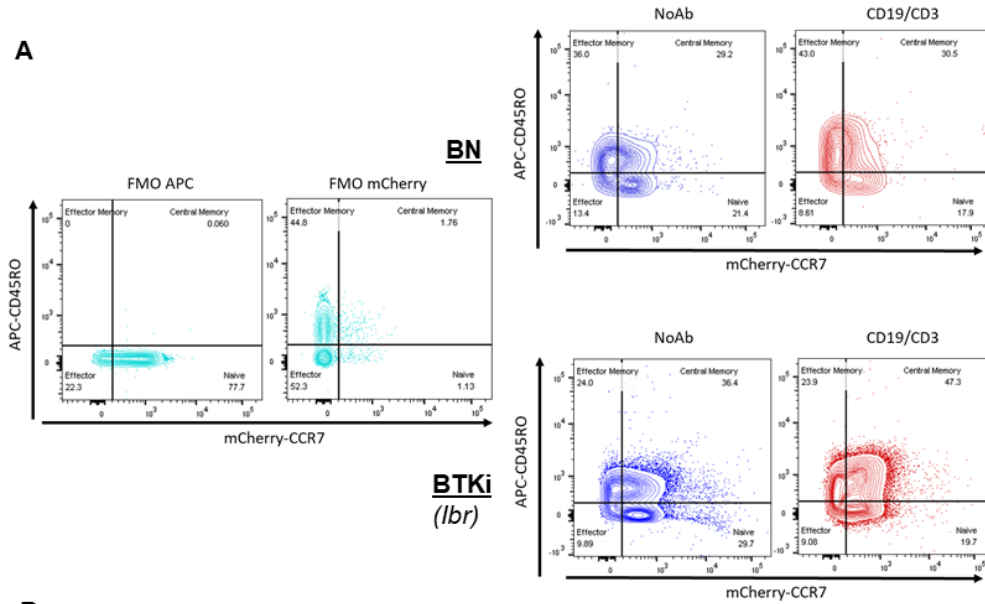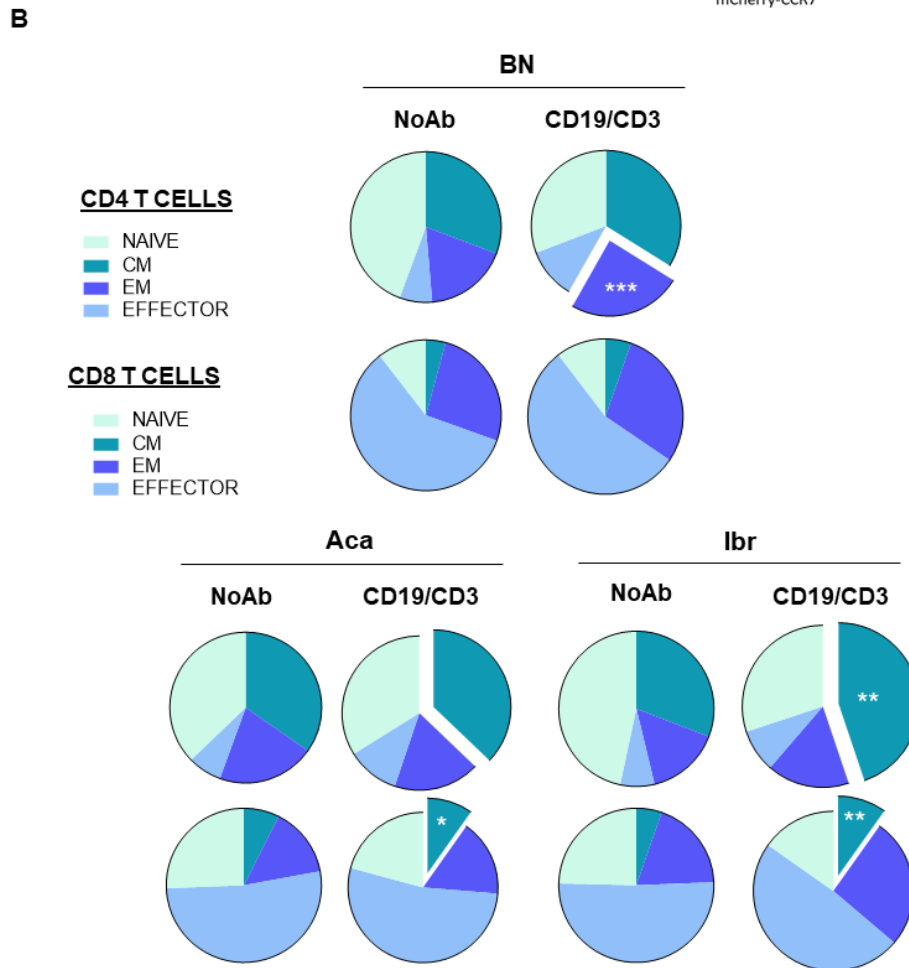

**Supplemental Figure S3. T-cell differentiation in response to CD19/CD3 bsAb.** PBMCs from BTKi-naïve (BN, n = 14) and BTKi-treated (BTKi, n = 30) patients were cultured with either

CD19/CD3 bsAb, or medium only. Gating on CD4+ or CD8+ subset, flow cytometry was performed to analyze T-cell differentiation, into naïve T cells, central memory T cells (CM), effector memory T cells (EM), and effector T cells, based on CCR7 and CD45RO expression. (A) Representative contour plot layout of a BTKi-naïve (BN) and an ibrutinib-treated (BTKi, lbr) patient after 3 days of culture with CD19/CD3 bsAb (CD19/3, red) or medium only (No Ab, blue) are shown. Fluorescence minus one (FMO) controls were used to set the gates. (B) The median proportions of naïve (light green), central memory (CM, green), effector memory (EM, blue) and effector cells (light blue) within CD4+ and CD8+ T cells for BTKi-naïve (BN, n = 14), acalabrutinib-treated (Aca, n = 11), and ibrutinib-treated (lbr, n = 19) samples patients are represented in pie charts. Asterisks indicate statistical significance using Wilcoxon matched-pair signed-rank test for comparison of different treatments applied to individual patient samples. \*,  $P < .05$ ; \*\*,  $P < .01$ ; \*\*\*,  $P < .001$ .

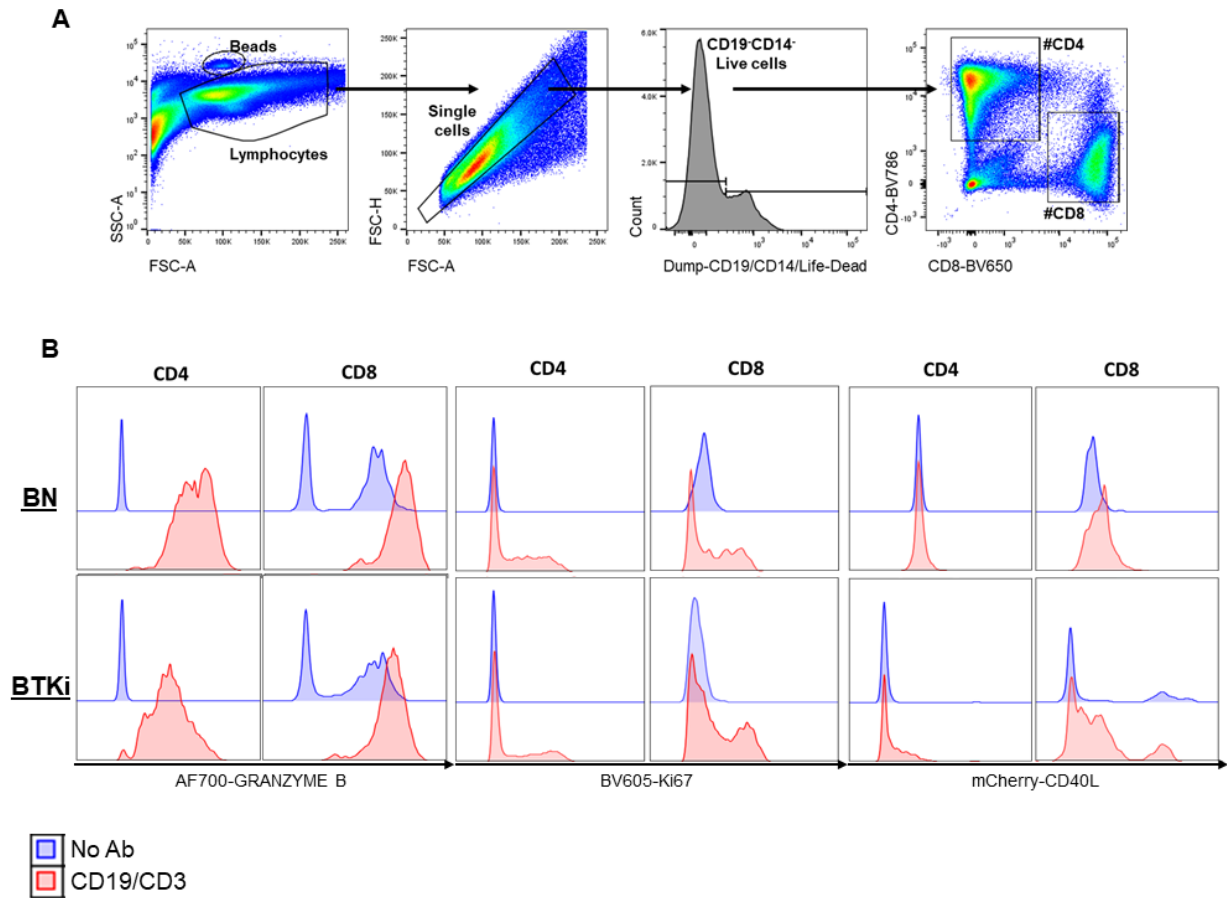

**Supplemental Figure S4. Increased expression of T-cell indicated activation markers in response to CD19/CD3 bsAb.** PBMCs from BTKi-naïve (BN,  $n = 13$ ) and BTKi-treated (BTKi,  $n = 26$ ) patients were cultured with either CD19/CD3 bsAb, or medium only. To analyze T-cell activation, activation factors and inhibitory checkpoint expression was assessed in CD4<sup>+</sup> or CD8<sup>+</sup> subsets by flow cytometry after 3 days of culture. (A) Representative gating strategy shown for a BTKi-treated patient sample. (B) Representative histograms overlays shown for BTKi-naïve (BN) and BTKi-treated (BTKi) patient samples of Granzyme B, Ki67 and CD40L mean fluorescence intensity on CD4<sup>+</sup> or CD8<sup>+</sup> T cells.

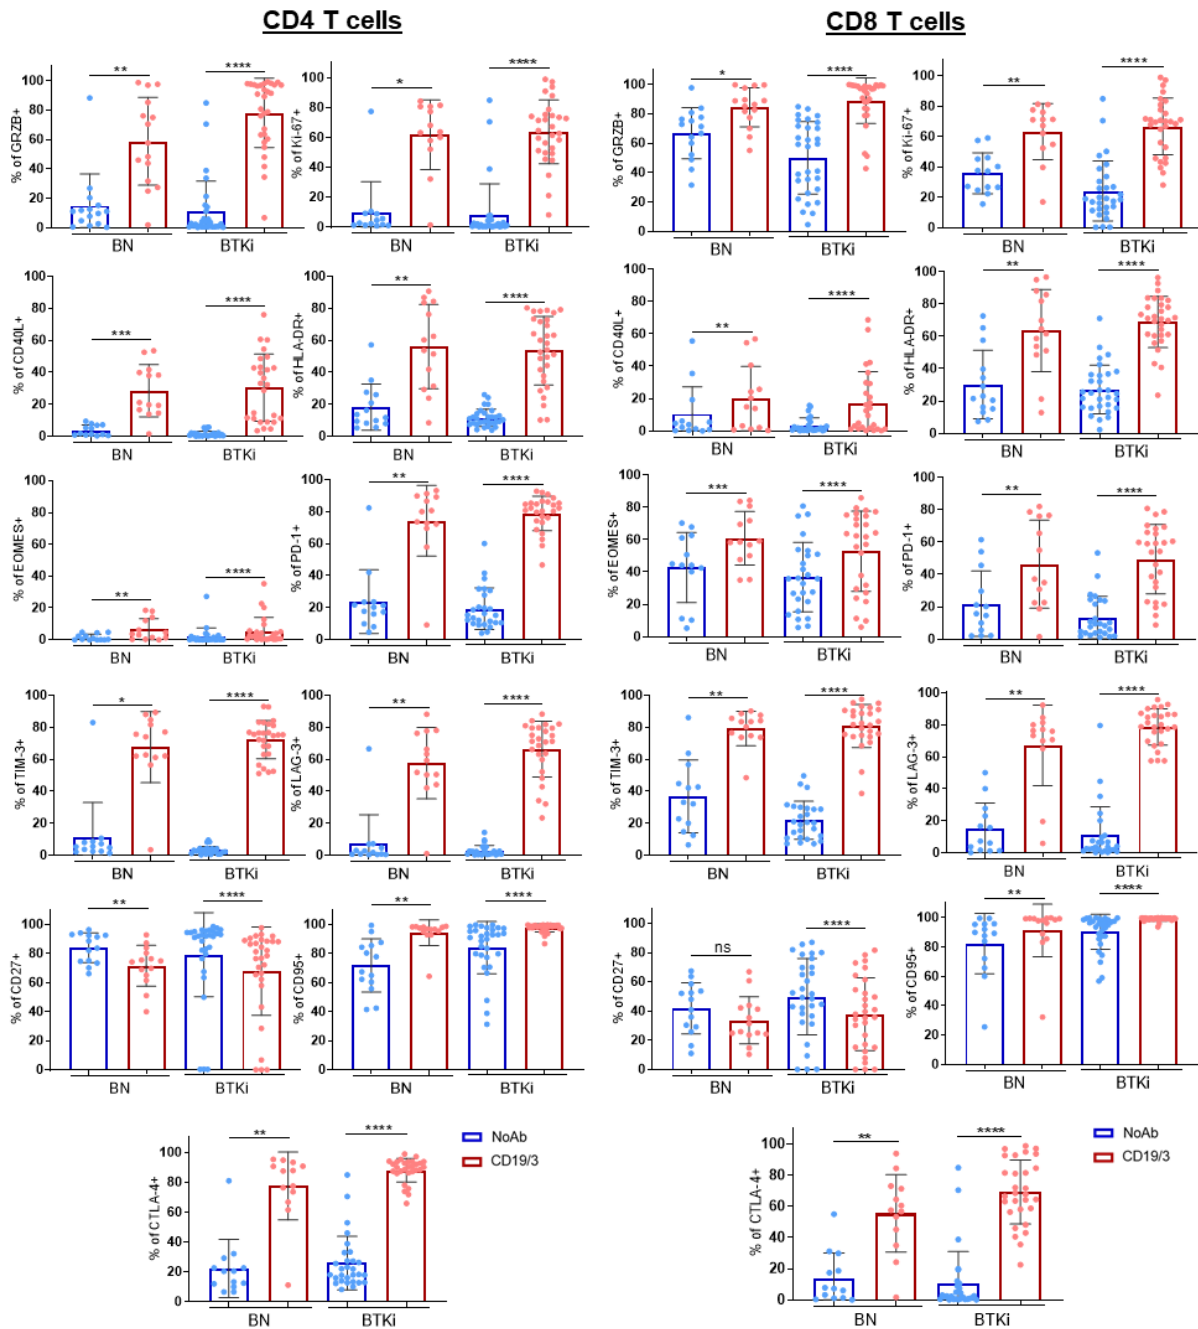

**Supplemental Figure S5. % of T-cells expressing indicated activation markers in response to CD19/CD3 bsAb.** PBMCs from BTKi-naïve (BN, n = 13) and BTKi-treated (BTKi, n = 26) patients were cultured with either CD19/CD3 bsAb, or medium only. Comparison of CD4+ and CD8+ T-cell frequencies staining positive for EOMES, PD-1, TIM-3, LAG-3, CD40L, HLA-DR, CD27, CD95, CTLA-4, Ki-67, and granzyme B (GRZB) between patient samples treated with CD19/CD3 bsAb (red bars) and samples with medium control (NoAb, blue bars). Asterisks indicate statistical significance using Wilcoxon matched-pair signed-rank test for comparison of

different treatments applied to individual patient samples. \*,  $P < .05$ ; \*\*,  $P < .01$ ; \*\*\*,  $P < .001$ ; \*\*\*\*,  $P < .0001$ .

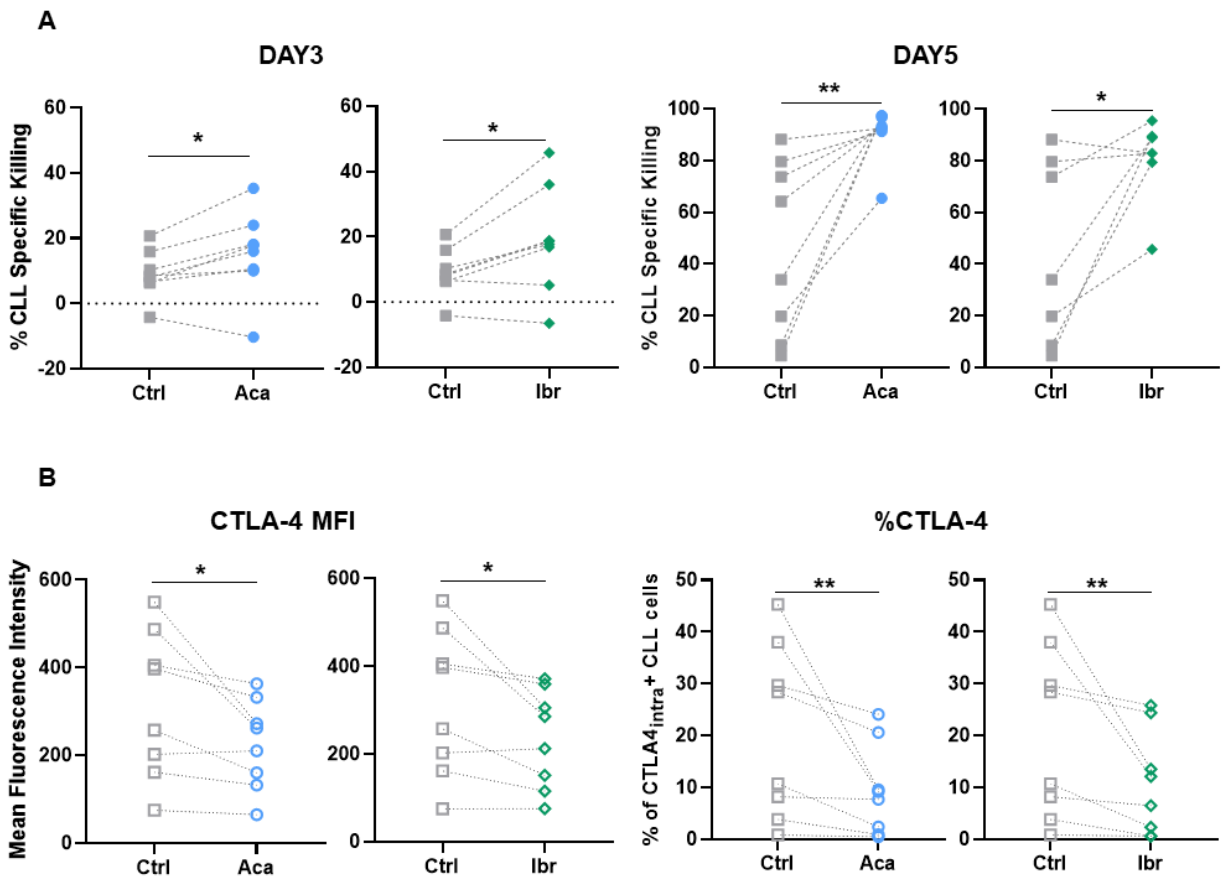

**Supplemental Figure S6. *In vitro* treatment with BTKis increases cytotoxicity of CD19/CD3 bsAb and downregulates CTLA-4 in CLL cells.** (A) Purified CLL cells obtained from BTKi-naïve patients (BN,  $n = 8$ ) were incubated with 1  $\mu\text{M}$  acalabrutinib (Aca, blue circles), 1  $\mu\text{M}$  ibrutinib (Ibr, green diamonds), or left untreated (Ctrl, grey squares) for 24 hours prior to addition of CD19/CD3 bsAb and healthy donor T cells at 1:10 E:T ratio. Depicted is the specific killing of CLL cells after 3 and 5 days of culture. Each dot represents one patient, lines connect samples obtained from the same patient. (B) Expression of intracellular CTLA-4 was measured by flow cytometry in CLL cells after 24 hours of culture with 1  $\mu\text{M}$  acalabrutinib (Aca, blue circles), 1  $\mu\text{M}$  ibrutinib (Ibr, green diamonds), or left untreated (Ctrl, grey squares). Mean Fluorescence Intensity (MFI) of the entire CLL population, and CLL-cell frequencies staining positive for CTLA-4 are shown for each patient sample. Each dot represents one patient, lines connect samples obtained from the same patient. Statistical significance by Wilcoxon matched-pair signed-rank test. \*,  $P < .05$ ; \*\*,  $P < .01$ .

| Patient ID | Sample ID | Treatment       | Age | Sex | Time on T <sub>x</sub> (mo) | Rai stage | T <sub>x</sub> N/RR | Cytogenetics           | IGHV Status | ALC x10e3/ $\mu$ L | E:T  | Figure  |
|------------|-----------|-----------------|-----|-----|-----------------------------|-----------|---------------------|------------------------|-------------|--------------------|------|---------|
| CLL-01     | 6125      | PRE (ibrutinib) | 70  | F   | 0                           | 4         | RR                  | del13q                 | U           | 77.67              | 0.03 | 5,6     |
| CLL-01     | 6593      | ibrutinib       | 71  | F   | 5.5                         | 4         | RR                  | del13q                 | U           | 76.45              | 0.02 | 5,6     |
| CLL-02     | 6353      | PRE (ibrutinib) | 76  | F   | 0                           | 2         | RR                  | del11q, +12            | U           | 40.42              | 0.05 | 1,4     |
| CLL-02     | 7201      | ibrutinib       | 77  | F   | 11.4                        | 2         | RR                  | del11q, +12            | U           | 23.08              | 0.04 | 1,2,3,4 |
| CLL-03     | 6811      | PRE (ibrutinib) | 70  | M   | 0                           | 4         | TxN                 | del17p, del13q         | M           | 100.91             | 0.03 | 4,5     |
| CLL-03     | 7791      | ibrutinib       | 71  | M   | 5.5                         | 4         | TxN                 | del17p, del13q         | M           | 65.77              | 0.03 | 4,5     |
| CLL-04     | 6977      | ibrutinib       | 68  | M   | 11.5                        | 3         | RR                  | del11q                 | U           | 3.26               | 1.15 | 1,2,3   |
| CLL-05     | 6988      | ibrutinib       | 69  | F   | 11.5                        | 2         | RR                  | del11q, del13q         | U           | 11.96              | 0.11 | 1,2,3   |
| CLL-06     | 6990      | ibrutinib       | 67  | F   | 11.8                        | 1         | RR                  | del13q                 | M           | 11.15              | 0.15 | 1,2,3   |
| CLL-07     | 7314      | ibrutinib       | 63  | M   | 12.1                        | 4         | RR                  | del13q, del11q, del17p | M           | 7.77               | 0.35 | 1,2,3   |
| CLL-08     | 7365      | ibrutinib       | 70  | F   | 11.7                        | 2         | TxN                 | del17p                 | U           | 14.17              | 0.15 | 1,2,3   |
| CLL-09     | 7431      | PRE (ibrutinib) | 59  | M   | 0                           | 4         | TxN                 | del17p, del13q         | M           | 61.72              | 0.04 | 4,5     |
| CLL-09     | 8097      | ibrutinib       | 60  | M   | 12                          | 4         | TxN                 | del17p, del13q         | M           | 63.08              | 0.06 | 1,2,4,5 |
| CLL-10     | 7435      | ibrutinib       | 73  | M   | 11.5                        | 1         | TxN                 | del13q                 | M           | 26.38              | 0.07 | 1,2,3   |
| CLL-11     | 7562      | PRE (ibrutinib) | 66  | F   | 0                           | 4         | RR                  | del11q, del13q         | U           | 155.5              | 0.02 | 1,2,3,4 |
| CLL-11     | 8156      | ibrutinib       | 67  | F   | 11.4                        | 4         | RR                  | del11q, del13q         | U           | 6.71               | 0.16 | 1,4     |
| CLL-12     | 7817      | ibrutinib       | 71  | M   | 11.5                        | 4         | TxN                 | Normal                 | U           | 5.03               | 0.46 | 1,2,3   |
| CLL-13     | 7832      | ibrutinib       | 48  | M   | 11.5                        | 1         | TxN                 | del17p                 | U           | 11.57              | 0.42 | 1,2     |
| CLL-14     | 7848      | ibrutinib       | 64  | M   | 11.6                        | 4         | TxN                 | del17p                 | U           | 62.4               | 0.27 | 1,2     |
| CLL-15     | 7852      | ibrutinib       | 39  | M   | 11.5                        | 4         | TxN                 | del17p                 | U           | 29.32              | 0.26 | 1,2     |



|        |       |                        |    |   |      |   |     |                   |   |        |      |         |
|--------|-------|------------------------|----|---|------|---|-----|-------------------|---|--------|------|---------|
| CLL-16 | 8184  | ibrutinib              | 62 | F | 14.5 | 1 | TxN | del17p            | U | 10.02  | 0.14 | 1,2,3   |
| CLL-17 | 8313  | PRE<br>(acalabrutinib) | 53 | F | 0    | 3 | RR  | del13q            | M | 191.09 | 0.01 | 5,6     |
| CLL-17 | 8330  | PRE<br>(acalabrutinib) | 53 | F | 0    | 3 | RR  | del13q            | M | 178.07 | 0.01 | 4,5     |
| CLL-17 | 8943  | acalabrutinib          | 54 | F | 11.9 | 3 | RR  | del13q            | M | 30.85  | 0.07 | 4,5,6   |
| CLL-18 | 8383  | PRE<br>(acalabrutinib) | 68 | F | 0    | 3 | RR  | del13q            | M | 76.51  | 0.07 | 5,6     |
| CLL-18 | 8701  | acalabrutinib          | 68 | F | 5.5  | 3 | RR  | del13q            | M | 38.3   | 0.07 | 5,6     |
| CLL-19 | 8756  | none                   | 48 | F | 0    | 2 | TxN | del13q            | M | 50.14  | 0.06 | 5       |
| CLL-20 | 8787  | ibrutinib              | 64 | F | 13.7 | 1 | TxN | +12, del17p       | U | 2.82   | 1.79 | 1,2,3   |
| CLL-21 | 9132  | PRE<br>(acalabrutinib) | 65 | M | 0    | 4 | RR  | del13q,<br>del11q | U | 119.92 | 0.04 | 4,5     |
| CLL-21 | 10116 | acalabrutinib          | 66 | M | 11.4 | 4 | RR  | del11q            | U | 84.64  | 0.05 | 4,5     |
| CLL-22 | 9141  | PRE (ibrutinib)        | 69 | M | 0    | 4 | TxN | del13q            | U | 64.96  | 0.07 | 5       |
| CLL-22 | 9695  | ibrutinib              | 70 | M | 5.4  | 4 | TxN | del13q            | U | 2.15   | 0.33 | 5       |
| CLL-23 | 9155  | PRE (ibrutinib)        | 51 | F | 0    | 0 | TxN | +12               | U | 223.17 | 0.03 | 5       |
| CLL-23 | 9763  | ibrutinib              | 52 | F | 5.5  | 0 | TxN | +12               | U | 1.19   | 0.44 | 5       |
| CLL-24 | 9253  | PRE (ibrutinib)        | 73 | M | 0    | 3 | TxN | del13q            | M | 75.51  | 0.04 | 5       |
| CLL-24 | 9788  | ibrutinib              | 73 | M | 5.5  | 3 | TxN | del13q            | M | 0.99   | 0.32 | 5       |
| CLL-25 | 9450  | PRE<br>(acalabrutinib) | 68 | F | 0    | 3 | TxN | Normal            | U | 225.83 | 0.01 | 4,5     |
| CLL-25 | 9939  | acalabrutinib          | 68 | F | 5.2  | 3 | TxN | Normal            | U | 36.62  | 0.03 | 4,5     |
| CLL-26 | 9746  | PRE<br>(acalabrutinib) | 64 | M | 0    | 3 | TxN | del13q            | U | 79.89  | 0.02 | 4       |
| CLL-26 | 10518 | acalabrutinib          | 65 | M | 11.6 | 3 | TxN | del13q            | U | 17.59  | 0.08 | 1,2,3,4 |
| CLL-27 | 9802  | acalabrutinib          | 61 | M | 11.9 | 1 | RR  | del11q            | U | 9.61   | 0.17 | 1,2,3   |
| CLL-28 | 10079 | acalabrutinib          | 69 | F | 11.9 | 1 | RR  | del13q            | U | 4.45   | 1.83 | 1,2,3   |
| CLL-29 | 10218 | acalabrutinib          | 57 | M | 11.4 | 1 | RR  | del13q            | U | 11.52  | 0.15 | 1,2,3   |
| CLL-30 | 10259 | acalabrutinib          | 74 | M | 11.2 | 2 | RR  | +12               | M | 9.95   | 0.10 | 1,2     |

|        |       |                     |    |   |      |   |     |                |    |        |      |         |
|--------|-------|---------------------|----|---|------|---|-----|----------------|----|--------|------|---------|
| CLL-31 | 10381 | PRE (acalabrutinib) | 53 | M | 0    | 4 | RR  | Normal         | U  | 74.51  | 0.02 | 4,5,6   |
| CLL-31 | 11707 | acalabrutinib       | 54 | M | 14.9 | 4 | RR  | Normal         | U  | 14.68  | 0.03 | 4,5,6   |
| CLL-32 | 10430 | PRE (ibrutinib)     | 67 | M | 0    | 4 | TxN | del13q, del11q | M  | 61.4   | 0.03 | 1,2,3,4 |
| CLL-32 | 12214 | ibrutinib           | 69 | M | 11.9 | 4 | TxN | del13q, del11q | M  | 8.99   | 0.03 | 1,2,3,4 |
| CLL-33 | 10434 | acalabrutinib       | 65 | M | 11.4 | 2 | TxN | del17p         | U  | 6.52   | 0.23 | 1,2,3   |
| CLL-34 | 10515 | none                | 66 | F | 0    | 1 | TxN | del13q         | M  | 123.11 | 0.03 | 1,2,3,6 |
| CLL-35 | 10784 | acalabrutinib       | 73 | M | 11.4 | 1 | RR  | del13q, del11q | U  | 19.77  | 0.12 | 1,2,3   |
| CLL-36 | 10831 | none                | 59 | M | 0    | 0 | TxN | Normal         | M  | 12.93  | 0.17 | 1,2,3   |
| CLL-37 | 11005 | PRE (ibrutinib)     | 71 | F | 0    | 4 | TxN | del13q, del17p | U  | 4.9    | 0.14 | 1,2,3,4 |
| CLL-37 | 12123 | ibrutinib           | 72 | F | 12.6 | 4 | TxN | del13q, del17p | U  | 6.14   | 0.08 | 1,2,3,4 |
| CLL-38 | 11120 | none                | 75 | F | 0    | 0 | TxN | Normal         | M  | 262.4  | 0.03 | 1,3,6   |
| CLL-38 | 11454 | PRE (ibrutinib)     | 76 | F | 0    | 0 | TxN | Normal         | M  | 253.8  | 0.05 | 5       |
| CLL-38 | 12028 | ibrutinib           | 76 | F | 5.5  | 0 | TxN | Normal         | M  | 28.38  | 0.06 | 5       |
| CLL-39 | 11126 | none                | 72 | F | 0    | 1 | TxN | Normal         | U  | 11.07  | 0.24 | 1,2,3   |
| CLL-40 | 11161 | none                | 70 | F | 0    | 1 | TxN | Normal         | M  | 8.44   | 0.20 | 1,2,3,6 |
| CLL-41 | 11228 | none                | 73 | M | 0    | 1 | TxN | del13q         | M  | 4.52   | 0.51 | 1,2,3   |
| CLL-42 | 11229 | none                | 59 | M | 0    | 0 | TxN | del13q         | ND | 10.7   | 0.18 | 1,2,3,6 |
| CLL-43 | 11278 | PRE (ibrutinib)     | 55 | F | 0    | 1 | RR  | normal         | U  | 39.26  | 0.03 | 5,6     |
| CLL-43 | 12025 | ibrutinib           | 56 | F | 6.1  | 1 | RR  | normal         | U  | 54.39  | 0.04 | 5,6     |
| CLL-44 | 11304 | acalabrutinib       | 61 | M | 11.5 | 3 | TxN | del13q         | M  | 12.59  | 0.26 | 1,2,3   |
| CLL-45 | 11305 | none                | 56 | F | 0    | 1 | TxN | del6q          | M  | 26.3   | 0.18 | 1,2,6   |
| CLL-46 | 11332 | acalabrutinib       | 53 | M | 11.6 | 1 | TxN | Normal         | U  | 8.07   | 0.69 | 1,2,3   |
| CLL-47 | 11508 | acalabrutinib       | 81 | M | 11.9 | 1 | TxN | del13q, del11q | M  | 3.17   | 0.73 | 1,2,3   |

|        |       |                 |    |   |      |   |     |                   |    |        |      |             |
|--------|-------|-----------------|----|---|------|---|-----|-------------------|----|--------|------|-------------|
| CLL-48 | 11515 | none            | 65 | M | 0    | 1 | TxN | del13q            | ND | 36.51  | 0.14 | 1,2,6       |
| CLL-49 | 11543 | PRE (ibrutinib) | 55 | M | 0    | 2 | TxN | del17p,<br>del13q | M  | 131.38 | 0.03 | 1,2,3,4,5,6 |
| CLL-49 | 12301 | ibrutinib       | 56 | M | 6.8  | 2 | TxN | del13q            | M  | 106.27 | 0.02 | 5,6         |
| CLL-49 | 12984 | ibrutinib       | 56 | M | 12.8 | 2 | TxN | del17p,<br>del13q | M  | 30.17  | 0.08 | 4,5         |
| CLL-50 | 11602 | acalabrutinib   | 61 | M | 11.4 | 3 | TxN | +12               | U  | 12.64  | 0.17 | 1,2,3       |
| CLL-51 | 11610 | none            | 66 | M | 0    | 4 | TxN | Normal            | M  | 37.57  | 0.05 | 1,2         |
| CLL-52 | 11627 | none            | 60 | M | 0    | 1 | TxN | Normal            | ND | 5.51   | 1.92 | 1,2,3       |
| CLL-53 | 11628 | none            | 60 | M | 0    | 1 | TxN | ND                | ND | 4.42   | 0.36 | 1,2,3       |
| CLL-54 | 11670 | acalabrutinib   | 69 | F | 11.2 | 1 | RR  | del13q            | M  | 27.82  | 0.06 | 1,2,3       |
| CLL-55 | 11682 | none            | 55 | F | 0    | 1 | TxN | Normal            | U  | 150.38 | 0.03 | 1,2,3       |
| CLL-56 | 11718 | ibrutinib       | 66 | M | 12   | 1 | RR  | del17p,<br>del18q | U  | 9.19   | 0.14 | 1,2,3       |
| CLL-57 | 12038 | ibrutinib       | 75 | F | 11.9 | 1 | TxN | del17p, +12       | ND | 2.53   | 7.11 | 1,2,3       |
| CLL-58 | 12655 | ibrutinib       | 75 | F | 11.7 | 1 | RR  | Normal            | U  | 3.17   | 0.78 | 1,2,3       |

**Supplemental Table S1. BTKi-treatment-naïve and BTKi-treated patient characteristics.**

Patients on BTKi were responding to therapy at time of sample collection. TxN, treatment-naïve or RR, relapsed-refractory disease prior to enrollment on BTKi therapy or sample collection. Effector:Target (E:T) ratio was determined by flow cytometry using the formula: (%CD8 + %CD4)/%CLL. F = female; M = male; IGHV = Immunoglobulin heavy chain mutation status, where M = mutated, U = unmutated ( $\geq 98\%$  sequence homology to germline), ND = not determined; ALC = absolute lymphocyte count at time of sample collection; del = deletion of indicated chromosomal region as determined by FISH.

| Specificity | Conjugate | Clone     | Supplier      |
|-------------|-----------|-----------|---------------|
| CD3         | APC-H7    | Clone SK7 | BD Pharmingen |
| CD3         | BUV496    | UCHT1     | BD Pharmingen |
| CD4         | APC       | RPA-T4    | BD Pharmingen |
| CD4         | BV786     | Clone SK3 | BD Pharmingen |
| CD5         | PECy7     | L17F12    | BD Pharmingen |

|               |                       |                            |               |
|---------------|-----------------------|----------------------------|---------------|
| CD8           | FITC                  | HIT8a                      | BD Pharmingen |
| CD8           | BV650                 | Clone RPA-T8 (RUO)         | BD Pharmingen |
| CD14          | AmyCyan/V500          | Clone M5E2 (RUO)           | BD Pharmingen |
| CD19          | AmyCyan/V500          | Clone HIB19 (RUO)          | BD Pharmingen |
| CD20          | PE                    | L27                        | BD Pharmingen |
| CD25          | BUV395/6              | Clone 2A3 (RUO)            | BD Pharmingen |
| CD27          | PECy7                 | M-T271 (RUO)               | BD Pharmingen |
| CD95          | Pacific Blue/BV421    | Clone DX2 (RUO)            | BD Pharmingen |
| CD45RO        | APC                   | UCHL1 (RUO)                | BD Pharmingen |
| CCR7          | mCherry/PE-Dazzle 594 | Clone 150503 (RUO)         | BD Pharmingen |
| CCR6          | PE                    | 11A9 (RUO)                 | BD Pharmingen |
| CXCR3         | AF700                 | Clone 1C6/CXCR3            | BD Pharmingen |
| HLADR         | FITC                  | G46-6 (RUO)                | BD Pharmingen |
| TIM3 (CD366)  | PE                    | clone 7D3 (RUO)            | BD Pharmingen |
| CTLA4 (CD152) | PECy5                 | BNI3                       | BD Pharmingen |
| LAG3 (CD223)  | PECy7                 | 11C3C65                    | Biolegend     |
| Granzyme B    | AF 700                | GB11                       | BD Pharmingen |
| PD-1 (CD279)  | BV421                 | EH12.1                     | BD Pharmingen |
| Ki67          | BV605                 | Ki67                       | Biolegend     |
| EOMES         | FITC                  | WD1928                     | eBioscience   |
| CD40L (CD154) | mCherry/PE-Dazzle 594 | 5C3                        | Biolegend     |
| CD200         | APC                   | 325516                     | R&D Systems   |
| LIVE/DEAD™    | AmyCyan/V500          | Aqua Dead Cell Stain Kit   | Invitrogen    |
| LIVE/DEAD™    | Pacific Blue/BV421    | Violet Dead Cell Stain Kit | Invitrogen    |

**Supplemental Table S2. Antibodies used in flow cytometry experiments.**
